# Supplementary material
Source: publisher site journal article supplement (https://www.dovepress.com/article/471347)
Supplement: Supplementary file 1 [file get_supplementary_file.php]

**Supplementary file 1: Interview guide**

| **Interviews to identify enablers and barriers to asthma medication adherence.**   - Thank you for agreeing to help us with this project. My name is Malath Al-Juhaishi, and we are conducting research to identify things that help with managing asthma and things that make it more difficult among Arabic-speaking Middle Eastern refugees and migrants. At an earlier time, you indicated that you would be willing to participate in the interview. The interview should take 30 to 45 minutes. It will be divided into three segments. In the first section, I will be gathering some demographic information. In the second segment, we will discuss your asthma control, and in the last part, we will talk about enablers and barriers to optimal asthma medication. If you feel uncomfortable with any questions, please let me know. This interview will be recorded and kept on a locked computer; I will not be collecting any identifiable or personal information from you. We aim to recruit 20–30 individuals to help us with this project.   First section participants’ demographics:   1. What gender do you identify as? (Male, Female, prefer not to answer) 2. "What is your age?" 3. Where were you born? 4. Please specify your migration status (refugees or migrants) 5. What is the highest degree or level of education you have completed?" 6. Primary School 7. Lower Secondary School (year 7 to year 9) 8. Upper Secondary School (year 10 to year 12) 9. Bachelor's Degree 10. Master's Degree 11. Ph.D. or higher 12. Trade School 13. Prefer not to say. 14. Which languages are you capable of speaking fluently? (English, Arabic, other, prefer not to say) 15. What is your occupation? 16. Is there a family history of asthma? 17. Do you have other health illnesses or chronic diseases? 18. When were you diagnosed with asthma? 19. In which country where you diagnosed with asthma? 20. What are your current asthma medications? (a sheet containing different types of inhalers will be shared with the participants to say which inhaler they are using) 21. What medication do you take every day? 22. What medication do you take occasionally? 23. How often do you refill your asthma medications? 24. How long have you been in Australia? 25. Did you come here with your family? 26. Do you live with your family? If yes, is there someone in the family who can help you?  - Second section (4 items): asthma control will be ascertained by asking participants four questions in the interview about:   (1) How often do you use your reliever inhaler?  (2) Do you experience symptoms at night?  (3) Do you experience symptoms in the morning?  (4) Activity-limitations posed by asthma.  Their response will be used to categorize them as having good, partial, or poor control in accordance with the Australia National Asthma Council guidelines.   | **GOOD CONTROL** | **PARTIAL CONTROL** | **POOR CONTROL** | | --- | --- | --- | | **If all of the following apply:** | **If one or two of the below apply:** | **If three or more of the below apply:** | | Daytime symptoms ≤2 days per week | Daytime symptoms >2 days per week | Daytime symptoms >2 days per week | | Need for reliever ≤2 days per week† | Need for reliever >2 days per week† | Need for reliever >2 days per week† | | No limitation of activities | Any limitation of activities | Any limitation of activities | | No symptoms during night or on waking | Any symptoms during night or on waking | Any symptoms during night or on waking |  - Third section: open-ended questions:   **Asthma perception: The Brief Illness Perception Questionnaire (BIPQ)**   1. How much does your asthma affect your life? 0-10 2. How long do you think your asthma will continue? 0-10 3. How much control do you feel you have over your asthma? 0-10 4. How much do you think your treatment can help your asthma? 0-10 5. How much do you experience symptoms from your asthma? 0-10 6. How concerned are you about your asthma? 0-10 7. How well do you feel you understand your asthma? 0-10 8. How much does your asthma affect you emotionally? (Does it make you angry scared, upset, or depressed)? 0-10   **Medications perception:**   1. Do you use complementary medicine (non-prescribed medications, herbal remedies, or dietary supplements) to manage your asthma? 2. Do you use other traditional ways to manage your asthma? If yes, what are they? 3. What do you think of your asthma medication, is it working? Are they helping you manage your asthma?   **Asthma management, asthma knowledge and inhaler technique:**   1. Do you think you understand asthma, asthma symptoms, and the benefit of using asthma medications? 2. What is an asthma attack? How do you manage your asthma during an asthma attack? 3. Do you know what an action plan is? 4. Do you have an action plan? Is it in Arabic? Do you find the information easy to follow? 5. Did you receive any form of education about asthma symptoms, triggers, and acute asthma attacks? If yes from who/where? If not, how did you learn about asthma? 6. Have you been shown how to use your asthma inhaler? 7. When was the last time your inhaler was assessed? 8. Can you show me how to use your inhaler?   **Patient-healthcare relationship:**   1. Do you have a regular GP/pharmacist? If yes, what makes you come back to them? If not, why? 2. Dose your regular GP/pharmacist speak Arabic? If yes, why did you choose an Arabic-speaking healthcare provider?   **Enablers and barriers:**   1. After your diagnosis did you make any changes in the household? 2. Have you experienced anything that makes it harder to manage your asthma? 3. Is there anything others can provide to help you manage your asthma? 4. I just need to ask you about a few situations and see if they apply to you:  - I sometimes forget to take my medications. - I know what asthma is, how to use an inhaler, and understand the benefit of taking asthma medications. - I have a good relationship with my GP, I trust them and can communicate with them comfortability. - Some people do not use their medication because it is expensive, I sometimes feel the same way. - I sometimes feel the medications are not working and I am not getting a benefit from them, so I do not use them.   Before we wrap things up and talk about the next steps, do you have any last comments regarding this area of research? Would you like to review or modify your answers before we end the interview?  Thank you for your participation. |
| --- | --- | --- | --- | --- | --- | --- | --- | --- | --- | --- | --- | --- | --- | --- | --- | --- | --- | --- |

**Supplementary file 2: Selected quotes from interviews for each theme**

| **Theme 1: Participants’ descriptions of their experience with asthma** | |
| --- | --- |
| Category | Quotes |
| Understanding of the illness | |
| Diagnosis | 1. “Initially, they said it was hay fever then they said it might be something else and they kept guessing until last year, when they finally stopped going in circles and diagnosed me with asthma” - Migrant 1 2. “I was surprised when I was diagnosed with asthma, I still do not understand it” - Refugee 6 |
| Attributing causes | 1. "I was diagnosed with asthma after I turned 20 years old. What happened to me was a psychological thing, my brother went missing, and I kept thinking about it and I felt sad and couldn’t breathe”-Refugee 2. |
| Emotional consequences | |
| Embarrassment  Fear and worries.  Depressed  Denial | 1. “It’s embarrassing, when I cough people think I have COVID, so I wear it (a mask) all the time” - Refugee 2 2. “I felt scared when I experienced an asthma episode as I cannot breathe. I feel like when I am breathing at a fast pace” - Refugee 7 3. “Asthma makes me depressed and annoyed” - Refugee 6 4. “My asthma is not chronic. My son has asthma; we took him to the doctor to put him on a device to help him breathe. I am not that bad; I do not even lose consciousness” - Refugee 5 |
| Impact on the quality of life and social support | |
| Avoiding triggers - Carpet and strong smell | 1. “I changed the detergent, I used to use perfumed detergent but now I stopped using those ones. I changed the house that we used to live in because it was fully carpeted” - Refugee 3 |
| Avoiding triggers - Dust and moulds | 1. “In my daughter’s room during winter there was hidden mould behind their wardrobes. Every time I enter their room, I get an attack. One day, I told my husband, and he found it (the mould) and removed it.” - Migrant 3 |
| Physical activity | 1. “I cannot run or play football; it is a bit hard and uncomfortable” - Migrant 6 |
| Social support | 1. “No one helps here. You can be dying on the road, and no one would offer help” - Refugee 1 |
| **Theme 2: Participant’s perception of asthma** | |
| Perception of asthma | 1. “Asthma opened the door for other conditions” -Migrant 4. |
| Perception of medication | 1. “The chemical medications caused harm to my body. Because of using Cortisone® (oral corticosteroids), I gained weight” - Migrant 2 2. “I hear that anise is good for coughing or marjoram is useful, so I started taking them because I feel like I'm taking a lot of medications” - Migrant 1 |
| Perception of healthcare providers  General practitioner | 1. “I feel that the general practitioners here have studied diseases superficially, so they do not understand asthma deeply and relies on this superficial information for diagnosis and treatment and does the experimentation without taking into account that there are differences between patients” -Migrant 1. |
| Visiting and Arabic speaking GP | 1. “I prefer a doctor who speaks Arabic even if my English is good; not the language but the way of communication’-Refugee 4. |
| Consultation time | 1. “The consultation time with the GP is 10 minutes, they see you very quickly and give you the script then they say they have seen you. If the GP were to explain to you about asthma and treatment, you will need a minimum of 30 minutes and the GP is not willing to sacrifice 30 minutes to explain to you, this is the truth”-Refugee 1. |
| Pharmacist | 1. “If you have the script, you can get it from anywhere. I go to any pharmacy which is the closet and the cheapest”-Refugee 1. |
| Visiting regular pharmacist | 1. “So many pharmacists out there. I don’t see the same faces as there are so many pharmacists within the same pharmacy”-Migrant 9. |
| **Theme 3: Asthma management** | |
| Asthma attack | 1. “Once I experience symptoms, I open windows and I sometimes walk into the garden, I feel this helps me sometimes to get oxygen for like five minutes. If I notice no improvement, then I take my medication” - Refugee 3 |
| Action plan | 1. “I do not have one, but I know what it is because my son is asthmatic, and the school requested that, so I know what it is” - Refugee 3 |
| Usage of complementary products | 1. “Anise is in some medications that is given to children who have cough, you can smell anise in these medications, so I thought about using them because it is natural and helps to relax so why not” - Migrant 1 2. “No one recommended anything to me or advised me on something specific. I would love to get help with that” - Refugee 2 |
| **Theme 4:  Asthma health literacy** | |
| Asthma Knowledge. | 1. “I do not understand it, I almost have no information about it. I use Google and Facebook to gather information about it” -Refugee 2. |
| Resources of information.  Asthma | 1. “I searched; I realised here in Australia sadly that you must ask, if you do not ask no one will give you the information and they do not tell you the complications of asthma, knowing the complications can make you become careful. Sometimes humans need to be aware of the complication to be careful” - Migrant 8 2. “From whom? No one teaches you here, if I did not have some information about it based on the previous study I would not know. So many people know nothing about asthma. Other people would not know 1 or 5% of details about asthma or asthma natures, there is no education” - Refugee 1 |
| **Theme 5:** **Suggestions to overcome perceived barriers to asthma management** | |
| Asthma Community centres | 1. “I wish there was a specialised clinic for asthma; it would reduce the workload a lot. They (asthma clinic clinicians) follow patients and diagnoses, and you can go every six months to follow up that would help a lot” - Migrant 5 |
| Asthma centres | 1. “I suggest opening centres that are similar to (NDSS) centres for asthmatic patients, and they can have a card to go (to these centres) and take monthly treatment at a further discounted rate because I think 90% of Australians suffer from asthma. It is my observation that the number of people with asthma increases on a daily basis” - Migrant 1 |

**Appendix 1. COREQ (Consolidated Criteria for Reporting Qualitative Research) Checklist.**

| **Topic** | **Item No.** | **Guide Questions/Description** | **Reported on Page No.** |
| --- | --- | --- | --- |
| **Domain 1: Research team and reflexivity**  Personal Characteristics | | |  |
| Interviewer/facilitator | 1 | Which author/s conducted the interview or focus group? | 5 |
| Credentials | 2 | What were the researcher's credentials? *E.g., PhD, MD* | 5 |
| Occupation | 3 | What was their occupation at the time of the study? | 5 |
| Gender | 4 | Was the researcher male or female? | 5 |
| Experience and training | 5 | What experience or training did the researcher have? | N/A |
| Relationship with participants | | |  |
| Relationship established | 6 | Was a relationship established prior to study commencement? | 6 |
| Participant knowledge of the interviewer | 7 | What did the participants know about the researcher? e*.g., personal goals, reasons for doing the research* | 6 |
| Interviewer characteristics | 8 | What characteristics were reported about the interviewer/facilitator? e.g., *Bias, assumptions, reasons and interests in the research topic* | 5-7 |
| **Domain 2: study design** | | |  |
| Theoretical framework | | |  |
| Methodological orientation and Theory | 9 | What methodological orientation was stated to underpin the study? 2*e.g. grounded theory, discourse analysis, ethnography, phenomenology, content analysis* | 7 |
| Participant selection | | |  |
| Sampling | 10 | How were participants selected? *e.g., purposive, convenience, consecutive, snowball* | 5-6 |
| Method of approach | 11 | How were participants approached? e*.g., face-to-face, telephone, mail, email* | 5 |
| Sample size | 12 | How many participants were in the study? | 7 |
| Non-participation | 13 | How many people refused to participate or dropped out? Reasons? | None |
| Setting | | | |
| Setting of data collection | 14 | Where was the data collected? e.g., home,  clinic, workplace | 7 |
| Presence of non-participants | 15 | Was anyone else present besides the  participants and researchers? | 5 |
| Description of sample | 16 | What are the important characteristics of  the sample? e.g., demographic data, date | 7-8 |
| Data collection | | | |
| Interview guide | 17 | Were questions, prompts, guides provided  by the authors? Was it pilot tested? | 6 |
| Repeat interviews | 18 | Were repeat inter views carried out? If  yes, how many? | No |
| Audio/visual recording | 19 | Did the research use audio or visual  recording to collect the data? | 7 |
| Field notes | 20 | Were field notes made during and/or after  the interview or focus group? | No |
| Duration | 21 | What was the duration of the inter views  or focus group? | 7 |
| Data saturation | 22 | Was data saturation discussed? | 7 |
| Transcripts returned | 23 | Were transcripts returned to participants  for comment and/or | 7 |
